# Supplementary material for: A Decade of GOSAT Proxy Satellite CH 4 Observations
Source: Copernicus journal article supplement (doi:10.5194/essd-2020-114), 2020-07-03
Supplement: Supplementary file [file essd-2020-114-AC1-supplement.pdf]

Response to Review Comments for *A Decade of GOSAT Proxy  
Satellite CH<sub>4</sub> Observations*

Parker et al.

October 14, 2020

**This supplement contains the additional figures that go along with our Author Response.**

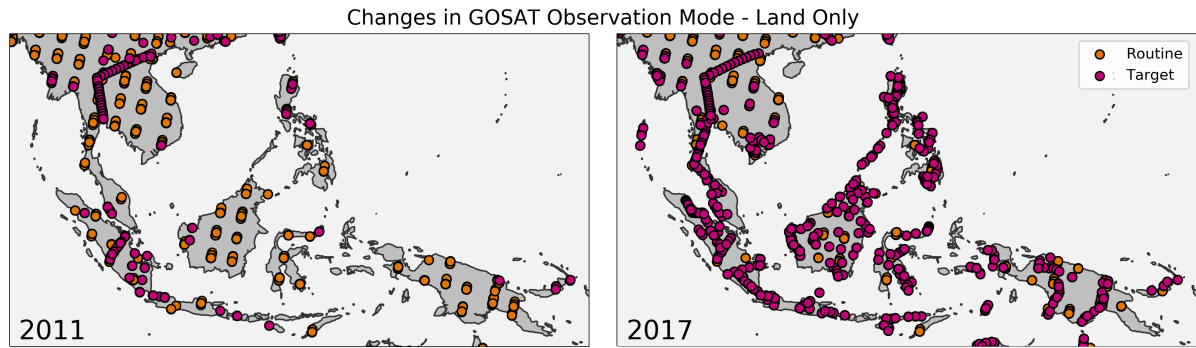

Figure 1: Figure contrasting the routine vs target observation modes for land-only measurements in 2011 and 2017 over Indonesia.

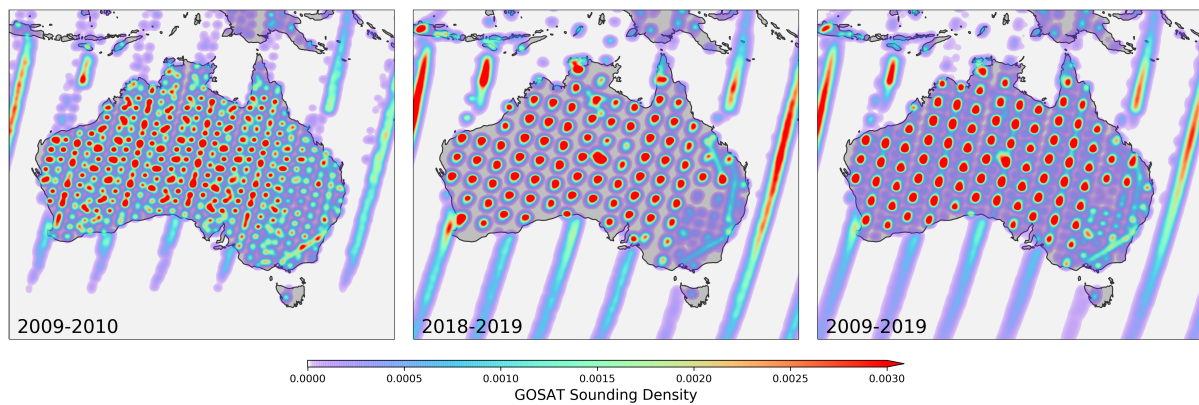

Figure 2: Figure contrasting the sampling density pattern over Australia for early in the mission versus recent years.

| Version | Project      | L1B               | Time Period | Ocean? | Comments                                                                                                                                                                                                                                                                                                                   | Publications Utilising Data                                                                                                                           |
|---------|--------------|-------------------|-------------|--------|----------------------------------------------------------------------------------------------------------------------------------------------------------------------------------------------------------------------------------------------------------------------------------------------------------------------------|-------------------------------------------------------------------------------------------------------------------------------------------------------|
| 1.0     | NCEO         | 006<br>007        | 2009-2010   | No     | First release.                                                                                                                                                                                                                                                                                                             | Parker et al. (2011)                                                                                                                                  |
| 2.0     | NCEO         | 050<br>080<br>100 | 2009-2010   | No     | Development version; only processed at TCCON overpasses; new radiometric calibration for L1B from JAXA applied.                                                                                                                                                                                                            |                                                                                                                                                       |
| 3.0     | CCI          | 050<br>080<br>100 | 2009-2010   | No     | First version generated as part of ESA CCI Round Robin and Algorithm Intercomparison. Improvements to surface pressure calculation taking into account instrument field-of-view. Significant speed improvements to preprocessing steps to allow multi-year processing.                                                     |                                                                                                                                                       |
| 3.1     | CCI          | 050<br>080<br>100 | 2009-2010   | No     | Incremental updates and bug fixes.                                                                                                                                                                                                                                                                                         |                                                                                                                                                       |
| 3.2     | CCI          | 050<br>080<br>100 | 2009-2010   | No     | Incremental updates and bug fixes. First version to be used for atmospheric inversions.                                                                                                                                                                                                                                    | Ross et al. (2013); Fraser et al. (2013); Dils et al. (2014); Wecht et al. (2014); Cressot et al. (2014); Berchet et al. (2015); Worden et al. (2015) |
| 4.0     | CCI<br>CRDP1 | 141<br>150<br>151 | 2009-2011   | No     | First version that was widely released to scientific community via CCI. Change in CO <sub>2</sub> model from CarbonTracker to MACCII; tightening of stratospheric covariance; spectral degradation applied as per Yoshida et al. (2013); higher resolution ERA-Interim; variable vertical grid based on tropopause height. | Fraser et al. (2014); Turner et al. (2015); Alexe et al. (2015)                                                                                       |
| 5.0     | CCI          | 160<br>161        | 2009-2013   | No     | Introduction of model median XCO <sub>2</sub> with MACCII, CarbonTracker and GEOS-Chem (as per Parker et al. 2015); CH <sub>4</sub> prior combines MACCII (troposphere) and TOMCAT (stratosphere); SRTM DEM used for topography; updated GOSAT L1B degradation correction based on Kuze et al. (2014).                     |                                                                                                                                                       |
| 5.1     | CCI          | 160<br>161        | 2009-2013   | No     | Resolved minor issue with uncertainty variable in 5.0.                                                                                                                                                                                                                                                                     |                                                                                                                                                       |
| 5.2     | CCI<br>CRDP2 | 160<br>161        | 2009-2013   | No     | Resolved minor issue with pressure weighting function in 5.1.                                                                                                                                                                                                                                                              | Parker et al. (2015); Stanevich et al. (2019, 2020)                                                                                                   |
| 6.0     | CCI<br>CRDP3 | 160<br>161        | 2009-2014   | Yes    | Inclusion of ocean sun-glint observations for first time.                                                                                                                                                                                                                                                                  | Webb et al. (2016); McNorton et al. (2016b); Siddans et al. (2017); Feng et al. (2017); Buchwitz et al. (2017b, 2018)                                 |
| 6.1     | CCI          | 160<br>161        | 2009-2015   | Yes    | Temporal extension of 6.0.                                                                                                                                                                                                                                                                                                 | Ganesan et al. (2017)                                                                                                                                 |
| 7.0     | CCI<br>CRDP4 | 201<br>202        | 2009-2015   | Yes    | New L1B data and updates to CO <sub>2</sub> models used in ensemble for Proxy calculation.                                                                                                                                                                                                                                 | Parker et al. (2016, 2018); McNorton et al. (2018); Sheng et al. (2018); Maasakkers et al. (2019, 2020); Lunt et al. (2019)                           |
| 7.0     | C3S          | 201<br>202        | 2009-2016   | Yes    | Time period extended and first delivery to C3S. No changes to processing so retained version number.                                                                                                                                                                                                                       |                                                                                                                                                       |
| 7.1     | C3S          | 201<br>202<br>210 | 2009-2017   | Yes    | Extension of 7.0 with updated L1B for latter years.                                                                                                                                                                                                                                                                        |                                                                                                                                                       |
| 7.2     | C3S          | 201<br>202<br>210 | 2009-2018   | Yes    | Extension of 7.1 with updated L1B for latter years.                                                                                                                                                                                                                                                                        | Zheng et al. (2019); Reuter et al. (2020); Yin et al. (2020); Parker et al. (2020b); ?; Tunnicliffe et al. (2020)                                     |
| 8.0     | C3S          | 210               | 2009-2018   | Yes    | Internal version for testing/development of new processing pipeline.                                                                                                                                                                                                                                                       |                                                                                                                                                       |
| 9.0     | C3S          | 210               | 2009-2019   | Yes    | <b>The dataset described in this publication.</b> Fully consistent timeseries. Uses new python-based preprocessing (LRPT).                                                                                                                                                                                                 | Parker et al. (2020a); Lu et al. (2020)                                                                                                               |

**Table B1.** Table showing the evolution of the University of Leicester GOSAT Proxy XCH<sub>4</sub> data product. Entries include the version number, the project that the data was generated for, the version of the GOSAT L1B data used, the time period covered by the data, whether ocean sun-glint data was generated, comments relating to changes/updates from previous versions and peer-reviewed publications that we are aware of that used the data. For the ESA GHG-CCI project, we also indicate which versions were officially delivered as part of the Climate Research Data Packages through the project. All Copernicus C3S versions were delivered to the Copernicus Climate Data Store.

Figure 3: Table showing details of the evolution of the University of Leicester GOSAT Proxy XCH<sub>4</sub> data product.

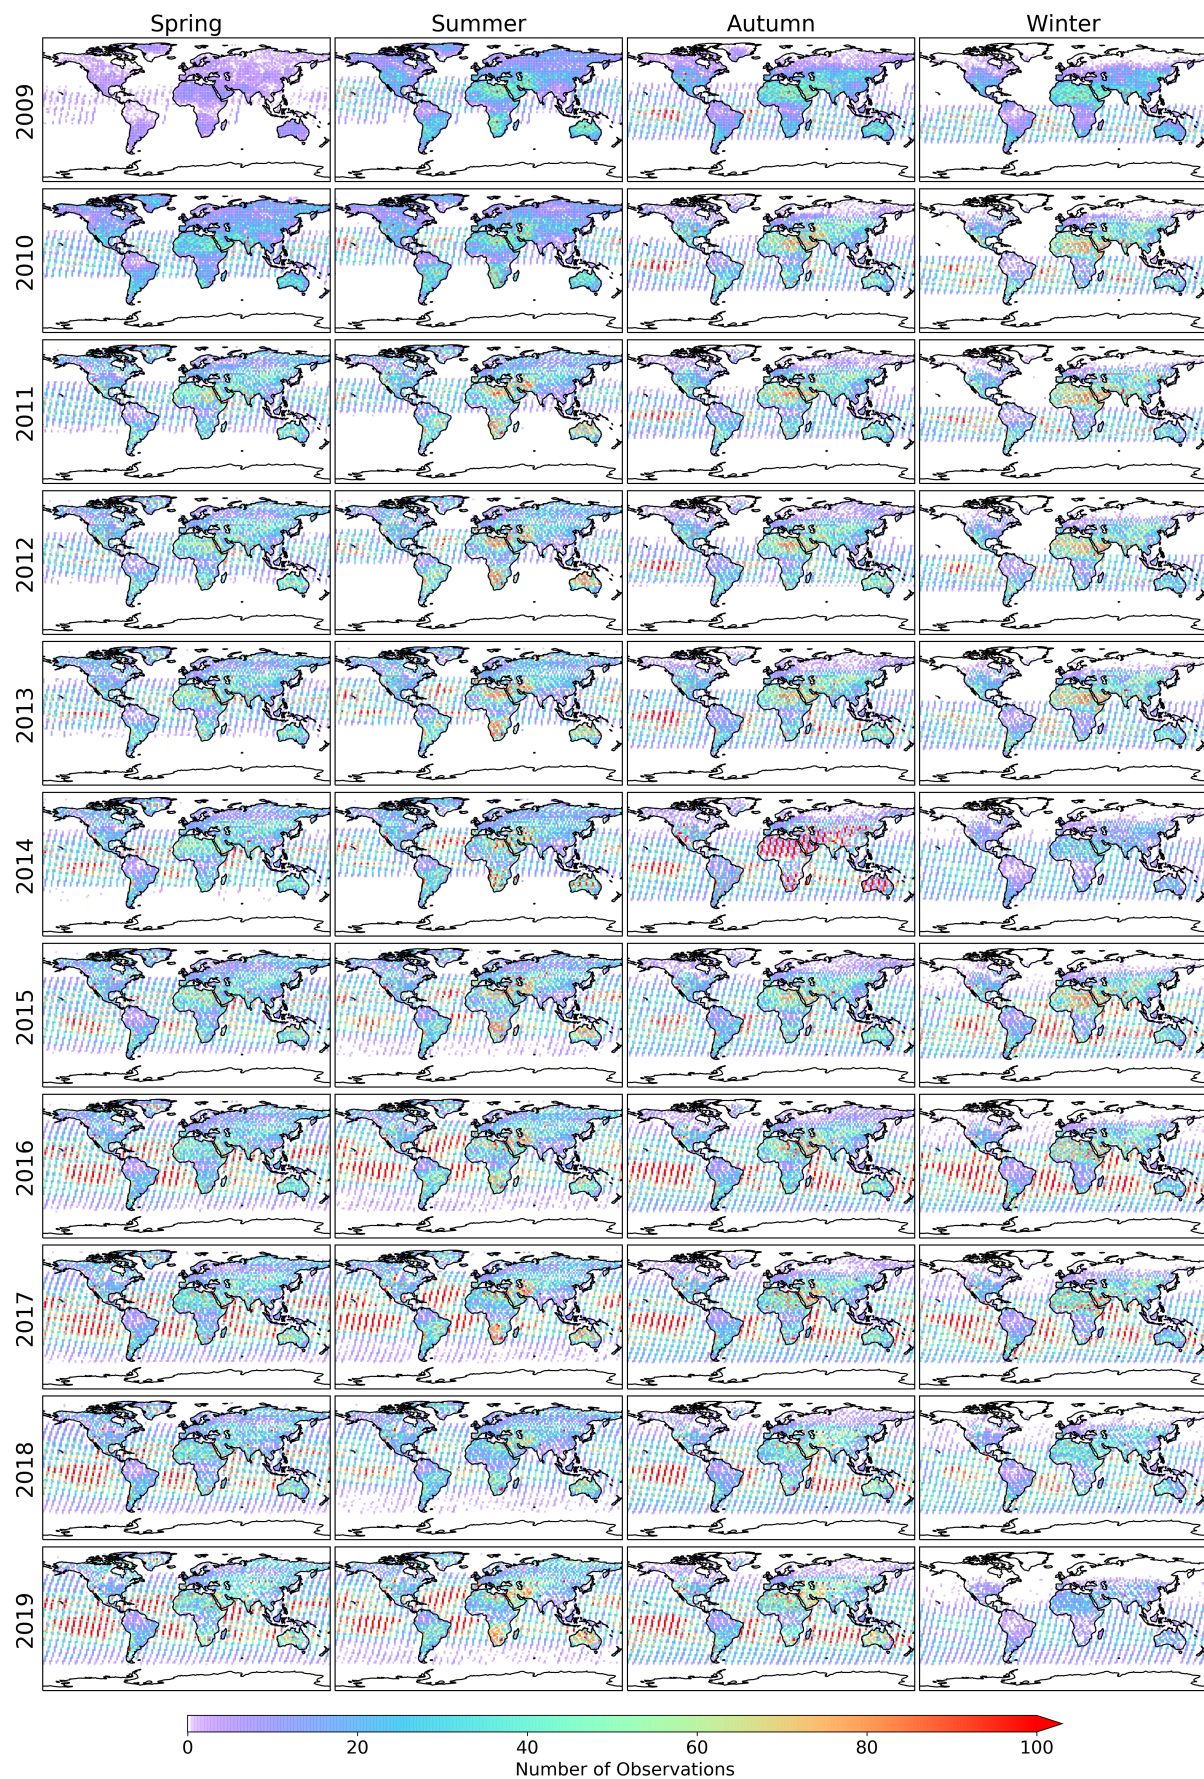

Figure 4: Figure showing the number of successful GOSAT XCH<sub>4</sub> measurements per 2° latitude-longitude bin for each year/season.
